# Supplementary material for: Determinants of Physical Activity in Older Adults: Integrating Self-Concordance into the Theory of Planned Behavior
Source: MDPI journal article supplement (doi:10.3390/ijerph18115759), 2021-05-27
Supplement: s1 [file s1]

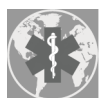

## Supplementary Materials

**Table S1.** Quality assessment of the reflective measurement models.

| Construct Indicator           | Factor Loading | <i>t</i> -value | Composite Reliability | AVE    |
|-------------------------------|----------------|-----------------|-----------------------|--------|
| Reference Point               | ≥ 0.60         | > 1.645         | ≥ 0.60                | ≥ 0.50 |
| <i>Attitude (A)</i>           |                |                 | 0.83                  | 0.54   |
| Q13A                          | 0.69           | 21.415          |                       |        |
| Q13B                          | 0.77           | 33.897          |                       |        |
| Q13C                          | 0.70           | 21.153          |                       |        |
| Q13E                          | 0.78           | 34.768          |                       |        |
| <i>Subjective Norm (SN)</i>   |                |                 | 0.71                  | 0.58   |
| Q12A                          | 0.45           | 3.748           |                       |        |
| Q12B                          | 0.98           | 39.954          |                       |        |
| <i>PBC (PBC)</i>              |                |                 | 0.80                  | 0.67   |
| Q11                           | 0.87           | 45.627          |                       |        |
| Q14                           | 0.76           | 21.906          |                       |        |
| <i>Intrinsic Regulation</i>   |                |                 | 0.83                  | 0.62   |
| Q10A                          | 0.84           | 56.106          |                       |        |
| Q10E                          | 0.83           | 52.436          |                       |        |
| Q10I                          | 0.68           | 23.766          |                       |        |
| <i>Identified Regulation</i>  |                |                 | 0.84                  | 0.63   |
| Q10C                          | 0.80           | 32.388          |                       |        |
| Q10G                          | 0.80           | 33.542          |                       |        |
| Q10K                          | 0.79           | 31.211          |                       |        |
| <i>Introjected Regulation</i> |                |                 | 0.83                  | 0.62   |
| Q10D                          | 0.87           | 41.681          |                       |        |
| Q10H                          | 0.84           | 37.300          |                       |        |
| Q10L                          | 0.62           | 12.893          |                       |        |
| <i>External Regulation</i>    |                |                 | 0.85                  | 0.73   |
| Q10B                          | 0.88           | 55.811          |                       |        |
| Q10J                          | 0.83           | 31.333          |                       |        |

Note. One item of each of the constructs' attitude (Q13D) and External Regulation (Q10F) were deleted because of insufficient factor loadings below 0.60 and because their exclusion increased the composite reliability [58].

**Table S2.** Differences between those with a weak and a strong habit.

|                 | Weak Habit<br>( <i>n</i> = 264–284) |           | Strong Habit<br>( <i>n</i> = 346–375) |           | <i>t</i> | <i>p</i> |
|-----------------|-------------------------------------|-----------|---------------------------------------|-----------|----------|----------|
|                 | <i>M</i>                            | <i>SD</i> | <i>M</i>                              | <i>SD</i> |          |          |
| Attitude        | 4.32                                | 0.60      | 4.87                                  | 0.26      | −14.31   | 0.000    |
| Subjective Norm | 3.27                                | 1.17      | 3.30                                  | 1.24      | −0.33    | 0.739    |
| PBC             | 4.35                                | 0.73      | 4.85                                  | 0.40      | −10.28   | 0.000    |
| Intention       | 4.27                                | 0.82      | 4.83                                  | 0.47      | −10.42   | 0.000    |
| Intrinsic       | 3.52                                | 0.96      | 4.60                                  | 0.58      | −16.66   | 0.000    |
| Identified      | 4.50                                | 0.86      | 4.81                                  | 0.43      | −13.55   | 0.000    |
| Introjected     | 2.83                                | 1.06      | 2.88                                  | 1.31      | −0.60    | 0.552    |
| External        | 1.85                                | 1.06      | 1.49                                  | 0.92      | 4.59     | 0.000    |

**Table S3.** Results of the hypothesis testing of the main structural model.

| Target Construct                    | $R^2$            |            | $Q^2$ |                    |
|-------------------------------------|------------------|------------|-------|--------------------|
| Impact Direction                    | Path Coefficient | $t$ -value | $f^2$ | Hypothesis Testing |
| <i>Intention Strength (IS)</i>      |                  |            |       |                    |
|                                     |                  | 0.313      |       | 0.303              |
| H1a: Attitude (+) → IS              | 0.135            | 3.661***   | 0.023 | (√)                |
| H2a: PBC (+) → IS                   | 0.496            | 13.968***  | 0.305 | √                  |
| H3a: Subjective Norm (o) → IS       | -0.059           | 1.925      | 0.005 | √                  |
| <i>Intrinsic Regulation (INR)</i>   |                  |            |       |                    |
|                                     |                  | 0.430      |       | 0.250              |
| H4a: Attitude (+) → INR             | 0.536            | 15.743***  | 0.432 | √                  |
| H5a: PBC (+) → INR                  | 0.226            | 5.518***   | 0.076 | √                  |
| H6a: Subjective Norm (-) → INR      | 0.008            | 0.244      | 0.000 | x                  |
| <i>Identified Regulation (IDR)</i>  |                  |            |       |                    |
|                                     |                  | 0.320      |       | 0.190              |
| H7a: Attitude (+) → IDR             | 0.390            | 9.470***   | 0.192 | √                  |
| H8a: PBC (+) → IDR                  | 0.275            | 6.004***   | 0.095 | √                  |
| H9a: Subjective Norm (-) → IDR      | 0.081            | 2.609**    | 0.010 | x                  |
| <i>Introjected Regulation (IJR)</i> |                  |            |       |                    |
|                                     |                  | 0.077      |       | 0.043              |
| H10a: Attitude (-) → IJR            | 0.022            | 0.695      | 0.000 | x                  |
| H11a: PBC (o) → IJR                 | -0.023           | 0.669      | 0.000 | √                  |
| H12a: Subjective Norm (+) → IJR     | 0.278            | 7.901***   | 0.083 | √                  |
| <i>External Regulation (EXR)</i>    |                  |            |       |                    |
|                                     |                  | 0.156      |       | 0.105              |
| H13a: Attitude (-) → EXR            | -0.133           | 3.501***   | 0.018 | (√)                |
| H14a: PBC (o) → EXR                 | -0.080           | 2.250*     | 0.007 | x                  |
| H15a: Subjective Norm (+) → EXR     | 0.361            | 12.262***  | 0.154 | √                  |

Note. Hypotheses regarding (+) positive relation, (-) negative relation, (o) no relation. \*/\*\*/\*\* The correlation is unilaterally significant at the level of 0.05/0.01/0.001.

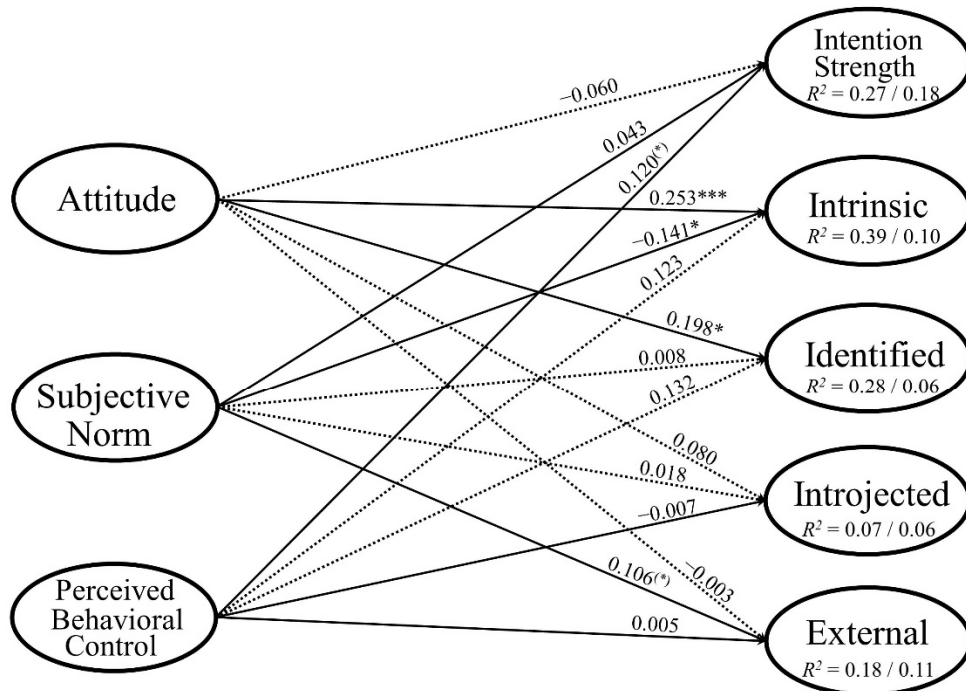

Notes. The continuous arrows illustrate the (partly) confirmed hypothesis, while the dashed arrows symbolize the rejection of a hypothesis. (\*)/\*\*/\*\* The path coefficient difference is unilaterally significant at the level of 0.10/ 0.05/ 0.001.

**Figure S1.** Results of the Group Comparison.
